# Supplementary material for: Stepwise synthesis of CoS2–C@CoS2 yolk–shell nanocages with much enhanced electrocatalytic performances both in solar cells and hydrogen evolution reactions
Source: Royal Society of Chemistry journal article supplement (doi:10.1039/c8ta03591a), 2018-01-01
Supplement: c8ta03591a1.pdf [file c8ta03591a1.pdf]

## **Electronic Supplementary Information (ESI)**

### **Stepwise synthesis of CoS<sub>2</sub>-C@CoS<sub>2</sub> yolk-shell nanocages with much enhanced electrocatalytic performances both in solar cells and hydrogen evolution reactions**

Yudi Niu, Xing Qian,\* Jie Zhang, Weimin Wu, Hongyu Liu, Chong Xu and Linxi Hou\*

College of Chemical Engineering, Fuzhou University, Xueyuan Road No. 2, Fuzhou 350116,  
China. \*E-mails: xingqian@fzu.edu.cn; lxhou@fzu.edu.cn.  
Fax: +86-0591-2286 6244; Tel: +86-0591-2286 5220.

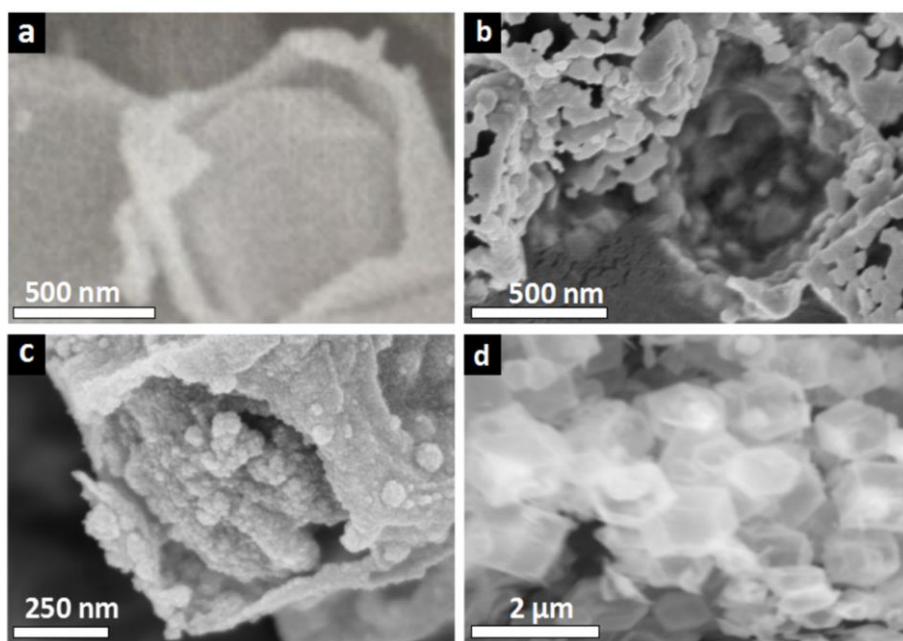

**Fig. S1.** SEM images of the cracked (a) CoS-C@CoS, (b) CoS/CoS<sub>2</sub>-C, (c) CoS<sub>2</sub>-C@CoS<sub>2</sub> after ultrasonic treatment, and (d) tungsten light scanning electron microscopy (TLSEM) image of CoS-C@CoS.

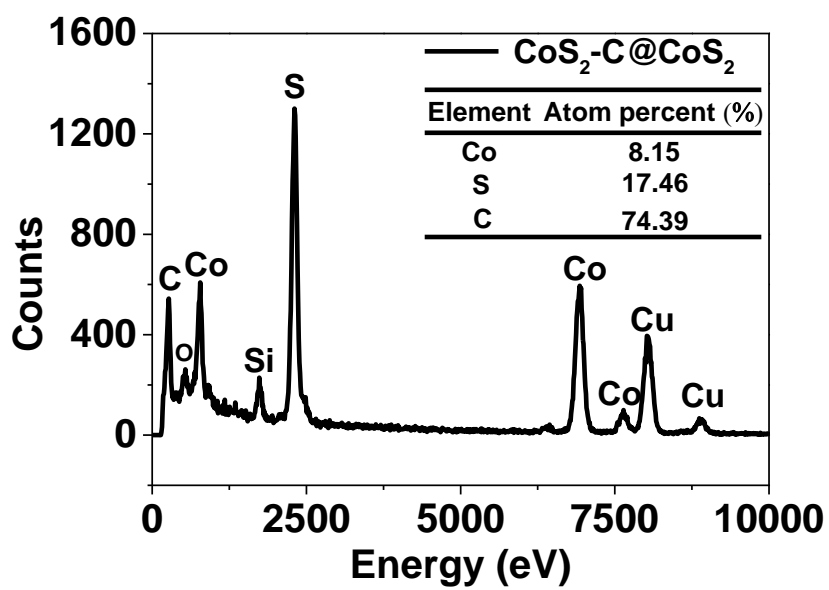

Fig. S2. EDX spectra image of CoS<sub>2</sub>-C@CoS<sub>2</sub>.

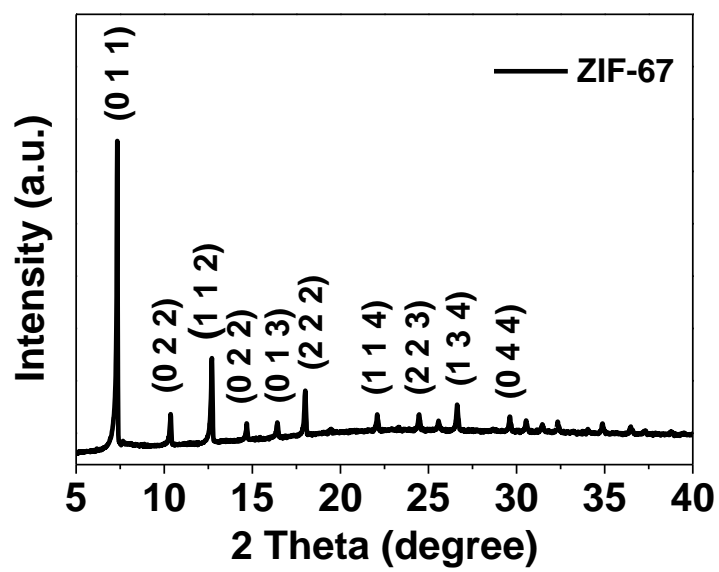

Fig. S3. XRD spectra of ZIF-67.

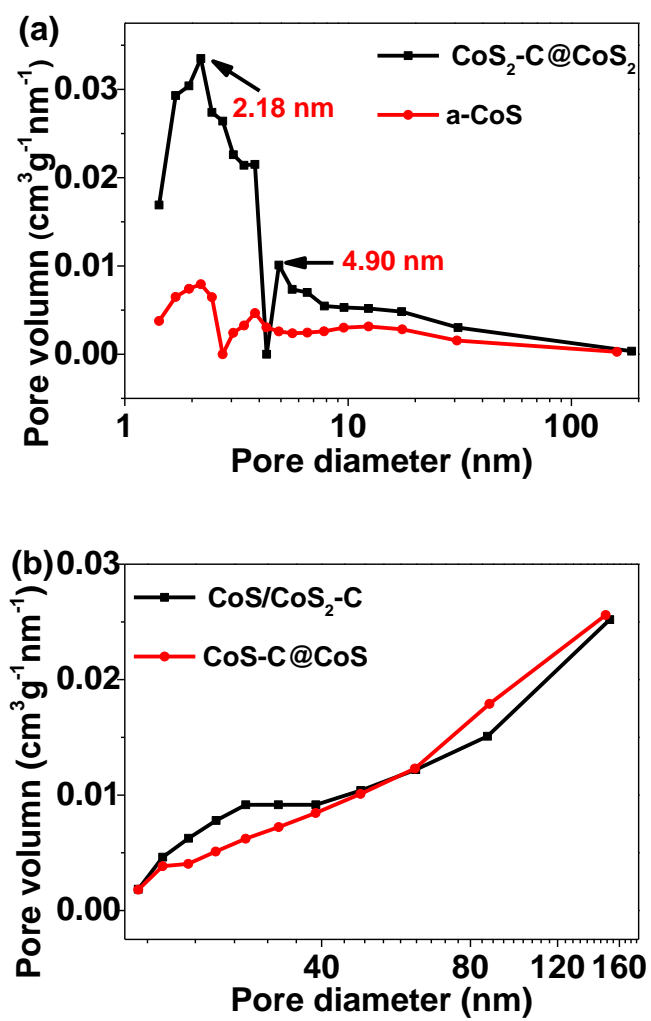

**Fig. S4.** Pore-size distribution of  $\text{CoS}_2\text{-C@CoS}_2$ ,  $\text{a-CoS}$ ,  $\text{CoS/CoS}_2\text{-C}$  and  $\text{CoS-C@CoS}$ .

**Table S1.** Pore-structure parameters derived from the BET curves.

| Samples                              | Pore volume( $\text{cm}^3 \text{g}^{-1}$ ) | Specific area ( $\text{m}^2 \text{g}^{-1}$ ) |
|--------------------------------------|--------------------------------------------|----------------------------------------------|
| CoS <sub>2</sub> -C@CoS <sub>2</sub> | 0.322                                      | 161                                          |
| CoS/CoS <sub>2</sub> -C              | 0.109                                      | 13.9                                         |
| CoS-C@CoS                            | 0.081                                      | 12.3                                         |
| a-CoS                                | 0.153                                      | 43.9                                         |

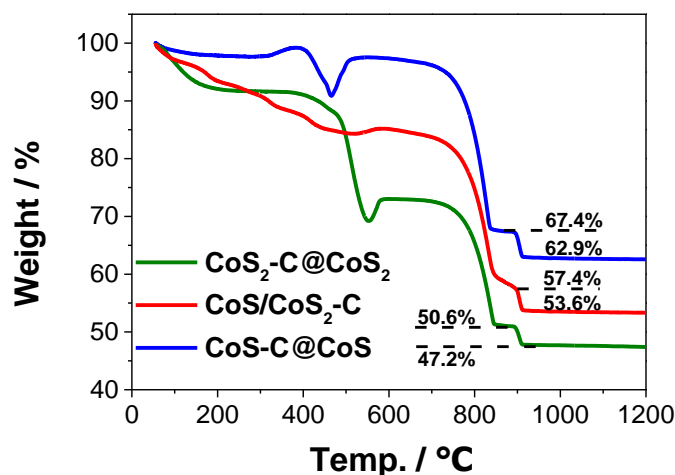

**Fig. S5.** Thermogravimetric (TGA) curves of CoS<sub>2</sub>-C@CoS<sub>2</sub>, CoS/CoS<sub>2</sub>-C and CoS-C@CoS samples.

Thermogravimetric analysis (TGA) of these samples was performed in air atmosphere to investigate the compositions of CoS<sub>2</sub>-C@CoS<sub>2</sub>, CoS/CoS<sub>2</sub>-C and CoS-C@CoS (Figure S5, ESI). A weight loss below 200 °C was measured for the samples, which was ascribed to the disappearance of adsorbed water. The observed weight loss between 200 and 500 °C was mainly attributed to the combustion of the C element.<sup>1</sup> An increase in weight, followed by a decrease in weight, which was observed between 500 and 735 °C, was ascribed to an initial oxidation of CoS<sub>2</sub>/CoS transforming to CoSO<sub>4</sub>. Then, the subsequent decomposition of CoSO<sub>4</sub> transformed to Co<sub>3</sub>O<sub>4</sub> between 735 °C and 890 °C. During this temperature, the mass content of the residual Co<sub>3</sub>O<sub>4</sub> of the samples CoS<sub>2</sub>-C@CoS<sub>2</sub>, CoS/CoS<sub>2</sub>-C and CoS-C@CoS was 50.6%, 57.4% and 67.4%, respectively. At the end, the stable mass content of CoO which was transformed by Co<sub>3</sub>O<sub>4</sub> from 890 to 910 °C has been recorded as 47.2%, 53.6% and 62.9%, respectively. By calculations, the roughly estimated mass loading of CoS<sub>2</sub>/CoS in CoS<sub>2</sub>-C@CoS<sub>2</sub>, CoS/CoS<sub>2</sub>-C (the main component can be observed as CoS<sub>2</sub>, according to the XRD result) and CoS-C@CoS were 77.4%, 87.9% and 76.3%, respectively.

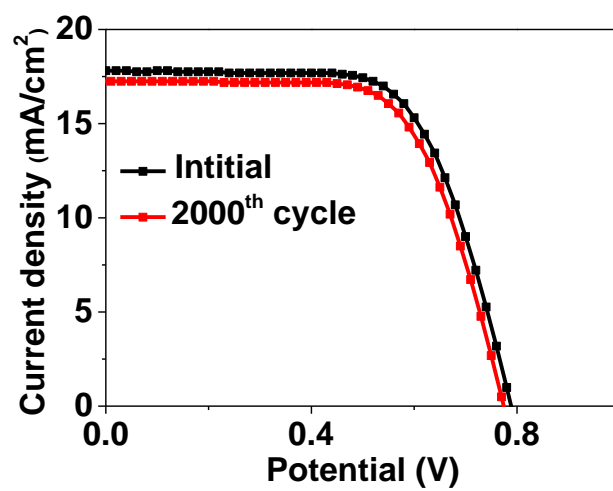

**Fig. S6.** *J*-*V* curves of CoS<sub>2</sub>-C@CoS<sub>2</sub> before and after 2000 times CV cycles.



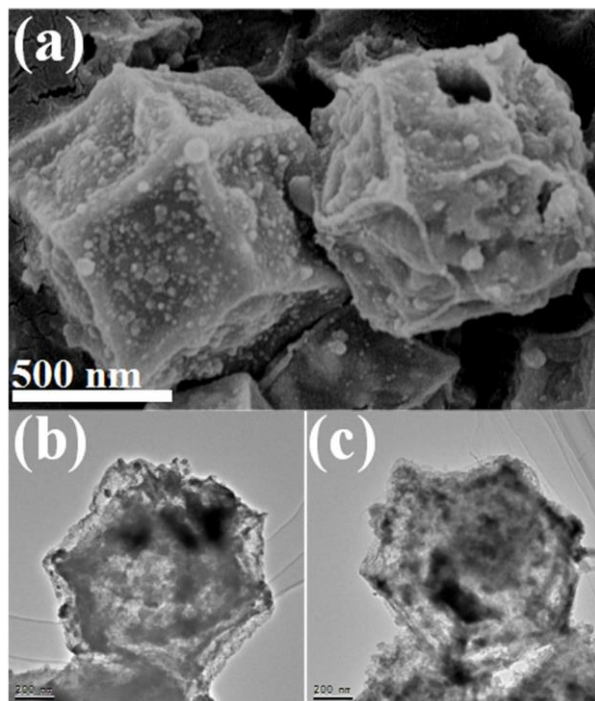

**Fig. S7.** (a) SEM image and (b, c) TEM images of  $\text{CoS}_2\text{-C@CoS}_2$  after the HER test.

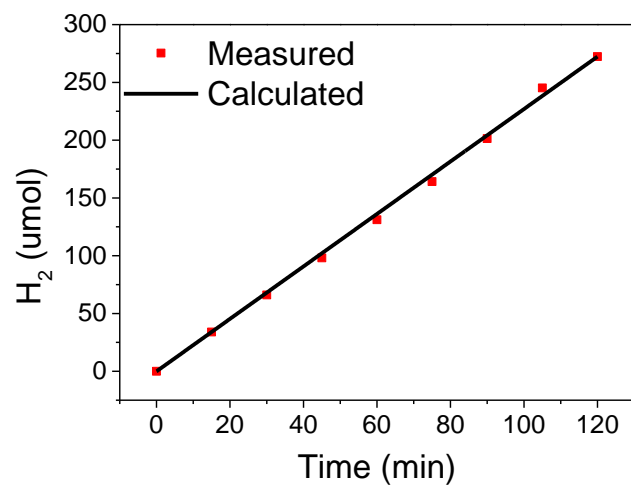

**Fig. S8.** Calculated (solid line) and measured (red dot) amount of hydrogen at different times for CoS<sub>2</sub>-C@CoS<sub>2</sub> at a constant current density of 20 mA cm<sup>-2</sup> in 0.5 M H<sub>2</sub>SO<sub>4</sub>.

**Table S2.** Comparisons of DSSC performances for as-obtained samples with other non-noble metal-based catalysts.

| catalyst                                          | $\eta$ (%) | $\eta_{Pt}$ (%) | $\eta/\eta_{Pt}$ | References |
|---------------------------------------------------|------------|-----------------|------------------|------------|
| CoS <sub>2</sub> -C@CoS <sub>2</sub>              | 9.32       | 8.24            | 1.13             | This work  |
| MOF-525/s-PT                                      | 8.91       | 8.21            | 1.08             | 2          |
| CoS <sub>2</sub> -C                               | 8.20       | 7.88            | 1.04             | 3          |
| CoNi <sub>2</sub> S <sub>4</sub><br>nanoribbon-CF | 7.03       | 6.45            | 1.09             | 4          |
| CoS <sub>2</sub> /RGO                             | 7.69       | 7.38            | 1.04             | 5          |
| CoS <sub>2</sub>                                  | 6.13       | 6.04            | 1.01             | 6          |
| CSG                                               | 5.43       | 5.84            | 0.93             | 7          |
| CoSe <sub>2</sub> /C-NCW                          | 8.92       | 8.25            | 1.08             | 8          |
| CoSe <sub>2</sub>                                 | 8.38       | 7.83            | 1.07             | 9          |
| NiCo <sub>2</sub> S <sub>4</sub><br>nanosheet     | 7.22       | 6.89            | 1.04             | 10         |
| CoNi <sub>2</sub> S <sub>4</sub><br>nanosheet     | 3.72       | 4.67            | 0.80             | 11         |

**Table S3.** Comparison of HER performance in acidic medium for as-obtained samples with other non-noble metal-based catalysts.

| Catalysts                                        | Onset potential (mV) | $\eta_{10}$ (mV) | Tafel slope (mV decade <sup>-1</sup> ) | References |
|--------------------------------------------------|----------------------|------------------|----------------------------------------|------------|
| CoS <sub>2</sub> -C@CoS <sub>2</sub>             | 19.0                 | 79.1             | 51.9                                   | This work  |
| CoS <sub>2</sub> -MW                             | —                    | 158              | 58.0                                   | 12         |
| Co <sub>9</sub> S <sub>8</sub> /CNFs             | —                    | 186              | 83                                     | 13         |
| CoP/CNs                                          | 55                   | 135              | 58                                     | 14         |
| CoMoS/CoMoO <sub>4</sub>                         | 80                   | —                | 58                                     | 15         |
| Co-CN                                            | 181                  | 266              | 112                                    | 16         |
| CoP NPs                                          | —                    | 100              | ~60                                    | 17         |
| CoP CPHs                                         | —                    | 133              | 51                                     | 18         |
| MoS <sub>2</sub> /Co <sub>3</sub> S <sub>4</sub> | —                    | 175              | 55.6                                   | 19         |
| NPPC                                             | 51                   | 159              | 74                                     | 20         |

## References

- 1 S. Huang, Y. Meng, S. He, A. Goswami, Q. Wu, J. Li, S. Tong, T. Asefa and M. Wu, *Adv. Funct. Mater.*, 2017, **27**, 1606585.
- 2 T. Y. Chen, Y. J. Huang, C. T. Li, C. W. Kung, R. Vittal and K. C. Ho, *Nano Energy*, 2017, **32**, 19–27.
- 3 X. D. Cui, Z. Q. Xie and Y. Wang, *Nanoscale*, 2016, **8**, 11984–11992.
- 4 L. Chen, Y. Zhou, H. Dai, T. Yu, J. G. Liu and Z. G. Zou, *Nano Energy*, 2015, **11**, 697–703.
- 5 H. Yuan, J. Liu, Q. Jiao, Y. Li, X. Liu, D. Shi, Q. Wu, Y. Zhao and H. Li, *Carbon*, 2017, **119**, 225–234.
- 6 J. C. Tsai, M. H. Hon and I. C. Leu, *Chem. - Asian J.*, 2015, **10**, 1932–1939.
- 7 L. Sun, Y. Bai, N. Zhang and K. Sun, *Chem. Commun.*, 2015, **51**, 1846–1849.
- 8 I. T. Chiu, C. T. Li, C. P. Lee, P. Y. Chen, Y. H. Tseng, R. Vittal and K. C. Ho, *Nano Energy*, 2016, **22**, 594–606.
- 9 J. Dong, J. Wu, J. Jia, S. Wu, P. Zhou, Y. Tu and Z. Lan, *Electrochim. Acta*, 2015, **168**, 69–75.
- 10 S. Y. Khoo, J. Miao, H. B. Yang, Z. He, K. C. Leong, B. Liu and T. Y. Tan, *Adv. Mater. Interfaces*, 2015, **2**, 1500384.

- 11 Z. Shi, K. Deng and L. Li, *Sci. Rep.*, 2015, **5**, 9317.
- 12 M. S. Faber, R. Dziejczak, M. A. Lukowski, N. S. Kaiser, Q. Ding and S. Jin, *J. Am. Chem. Soc.*, 2014, **136**, 10053–10061.
- 13 L. Gu, H. Zhu, D. Yu, S. Zhang, J. Chen, J. Wang, M. Wan, M. Zhang and M. Du, *Part. Part. Syst. Charact.*, 2017, **34**, 1700189.
- 14 T. Li, D. Tang and C. Li, *Int. J. Hydrogen Energy*, 2017, **42**, 21786–21792.
- 15 Y. R. Liu, X. Shang, W. K. Gao, B. Dong, X. Li, X. H. Li, J. C. Zhao, Y. M. Chai, Y. Q. Liu and C. G. Liu, *J. Mater. Chem. A*, 2017, **5**, 2885–2896.
- 16 J. Chen, H. Zhou, Y. Huang, H. Yu, F. Huang, F. Zheng and S. Li, *RSC Adv.*, 2016, **6**, 42014–42018.
- 17 D. H. Ha, B. Han, M. Risch, L. Giordano, K. P. C. Yao, P. Karayaylali and Y. Shao-Horn, *Nano Energy*, 2016, **29**, 37–45.
- 18 M. Xu, L. Han, Y. Han, Y. Yu, J. Zhai and S. Dong, *J. Mater. Chem. A*, 2015, **3**, 21471–21477.
- 19 X. Lei, K. Yu, H. Li and Z. Zhu, *Electrochim. Acta*, 2018, **269**, 262–273.
- 20 Y. Lin, J. Zhang, Y. Pan and Y. Liu, *Appl. Surf. Sci.*, 2017, **422**, 828–837.
